# Supplementary material for: Phase controlled synthesis of SnSe and SnSe2 hierarchical nanostructures made of single crystalline ultrathin nanosheets
Source: Royal Society of Chemistry journal article supplement (doi:10.1039/c4ce01868k), 2014-11-21
Supplement: c4ce01868k1.pdf [file c4ce01868k1.pdf]

## Supporting Information

### Phase controlled synthesis of SnSe and SnSe<sub>2</sub> hierarchical nanostructures made of single crystalline ultrathin nanosheets

*Parthiban Ramasamy, Palanisamy Manivasakan and Jinkwon Kim*

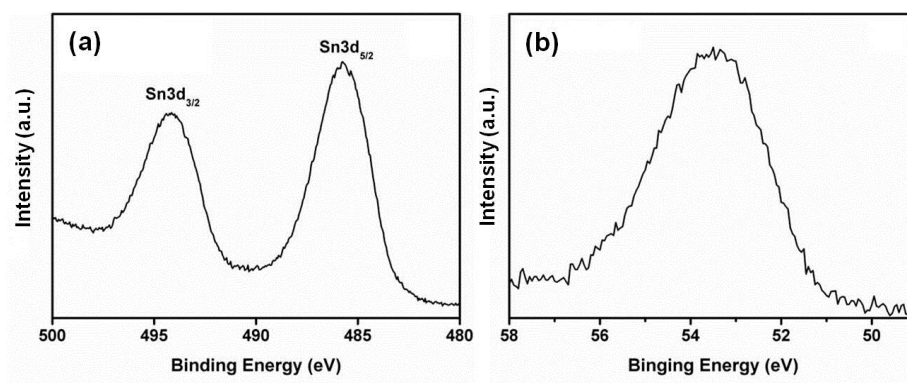

**Fig. S1** XPS spectra of the Sn 3d orbital and the Se 3d orbital of SnSe HNs.

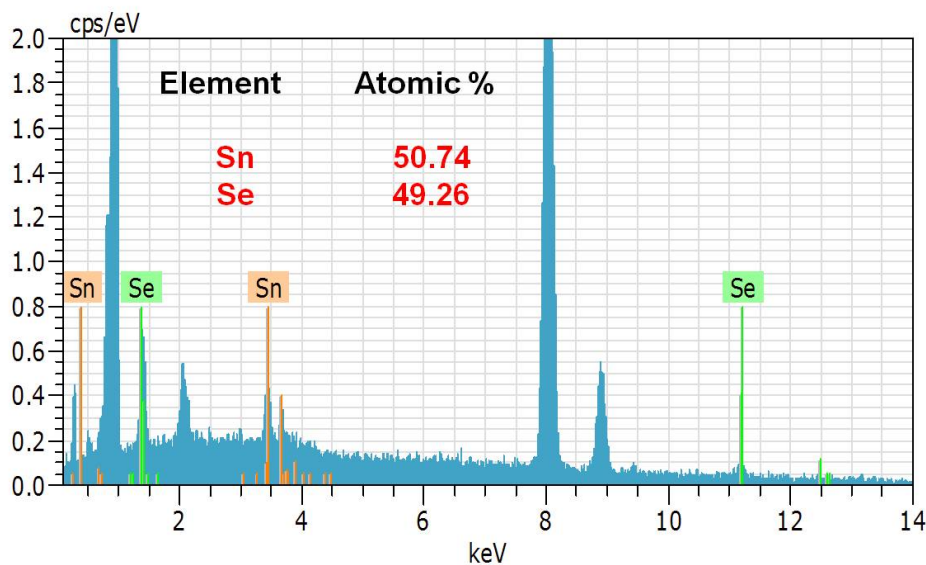

**Fig. S2** EDS spectrum of SnSe HNs.

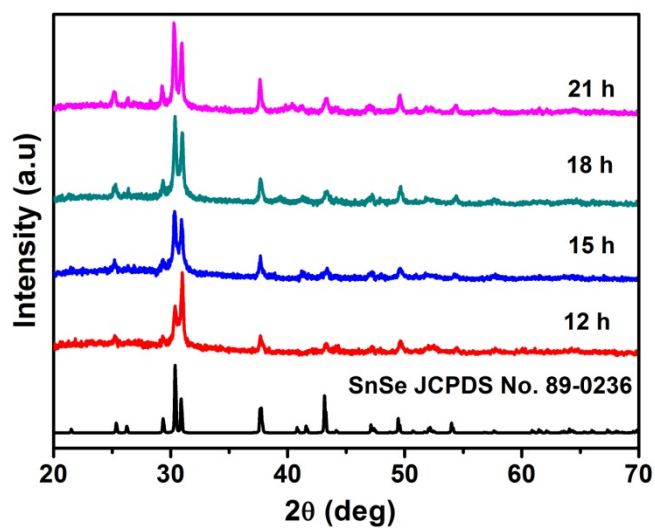

**Fig. S3** XRD patterns of the synthesized SnSe HNs with different reaction times.

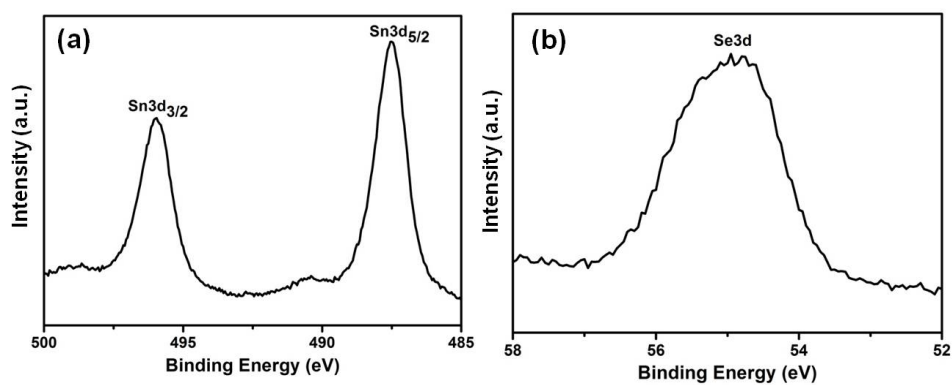

**Fig. S4** XPS spectra of the Sn 3d orbital and the Se 3d orbital of  $\text{SnSe}_2$  HNs.

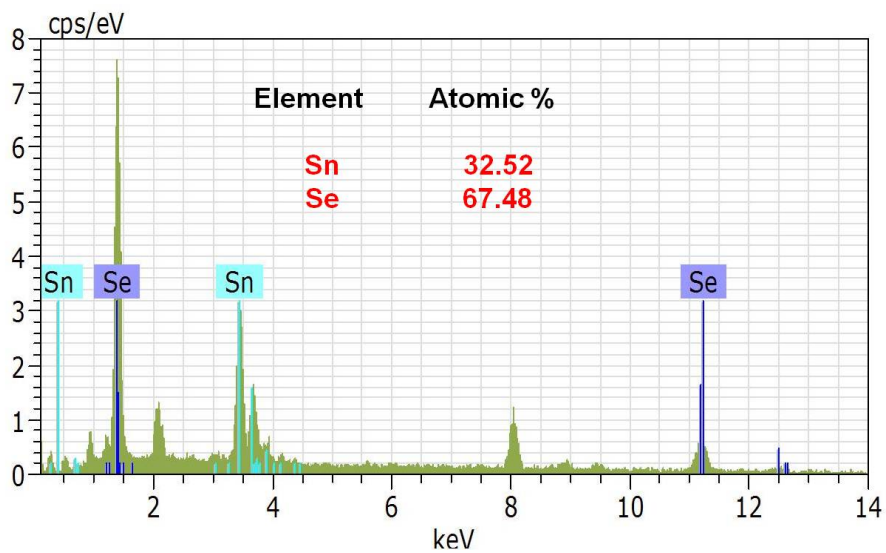

Fig. S5 EDS spectrum of SnSe<sub>2</sub> HNs.

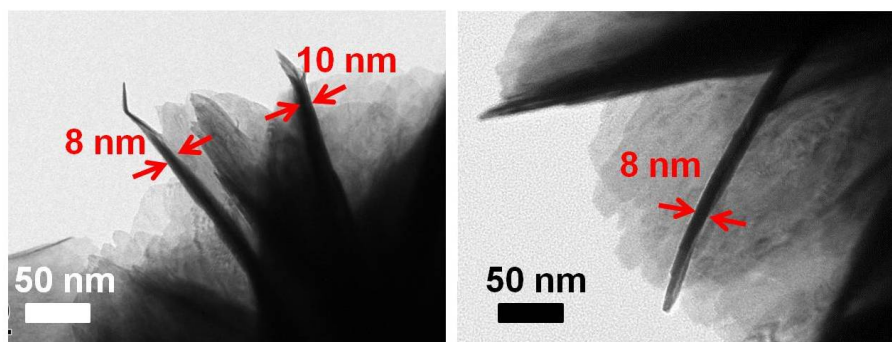

Fig. S6 TEM images of SnSe<sub>2</sub> HNs showing sheet thickness.

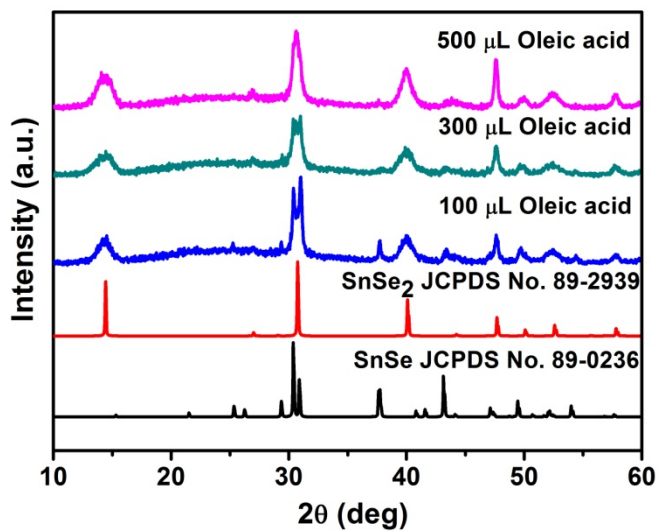

Fig. S7 XRD patterns of the products obtained with different amounts of oleic acid.

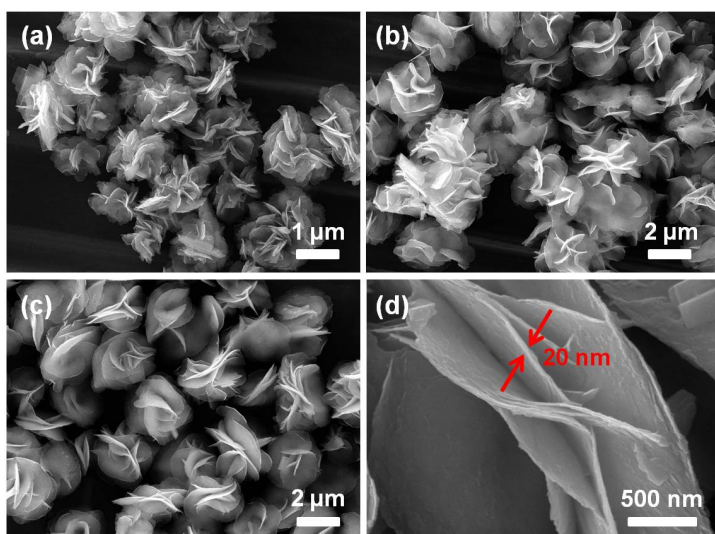

**Fig. S8** SEM images the products obtained with different amounts of oleic acid (a) 100, (b) 300, and (c and d) 500 μL.

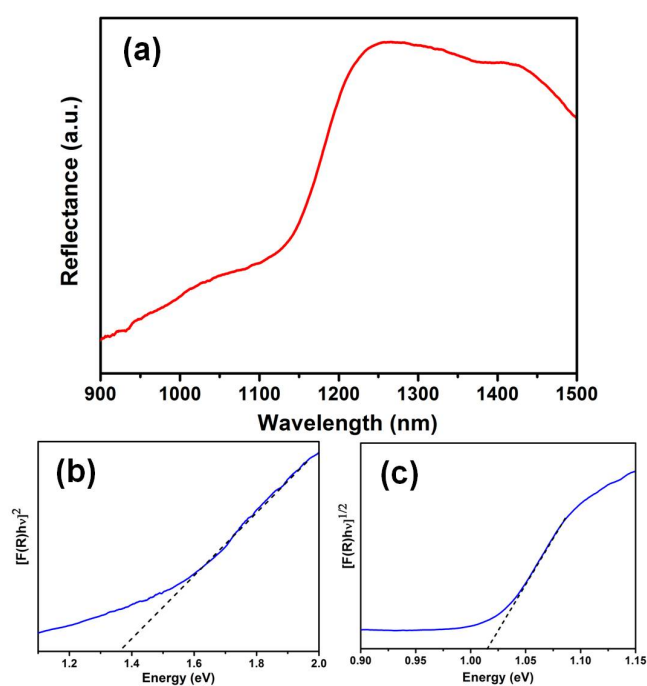

**Fig. S9** (a) Diffuse reflectance spectrum for SnSe HNs. Direct and indirect bandgaps were calculated from plots of  $[F(R)hv]^2$  and  $[F(R)hv]^{1/2}$  vs energy, shown in panels b and c, respectively.

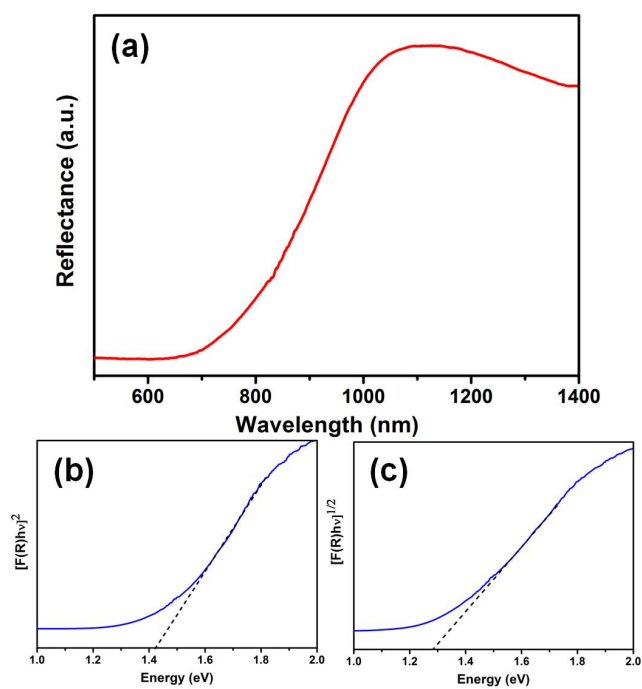

**Fig. S10** (a) Diffuse reflectance spectrum for SnSe<sub>2</sub> HNs. Direct and indirect bandgaps were calculated from plots of  $[F(R)hv]^2$  and  $[F(R)hv]^{1/2}$  vs energy, shown in panels b and c, respectively.

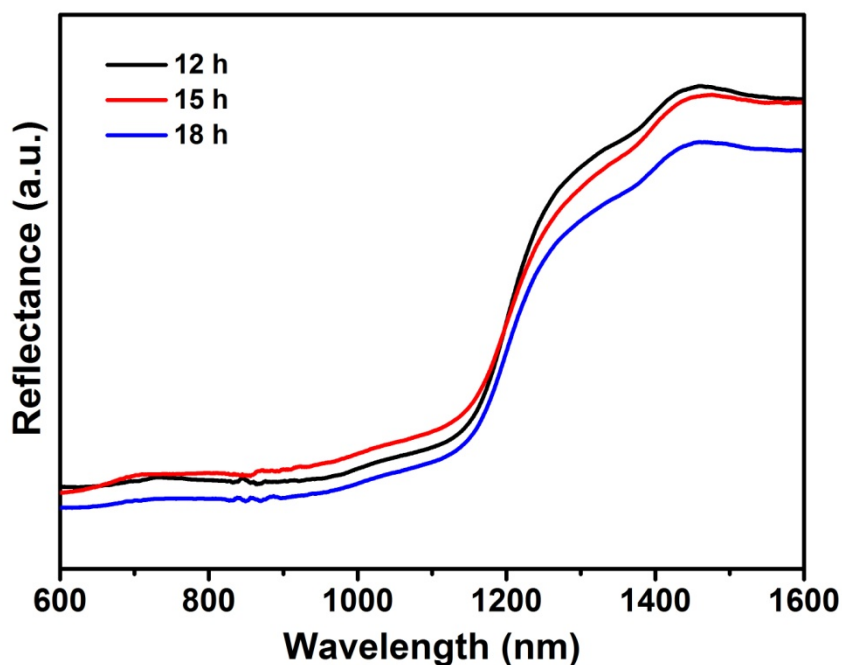

**Fig. S11** Diffuse reflectance spectra of SnSe HNs as a function of reaction time.

**Table S1.** Calculated direct and indirect bandgaps of SnSe HNs as function of reaction time.

| Reaction time<br>(h) | Direct bandgap<br>(eV) | Indirect bandgap<br>(eV) |
|----------------------|------------------------|--------------------------|
| 12                   | 1.60                   | 0.96                     |
| 15                   | 1.56                   | 0.97                     |
| 18                   | 1.50                   | 0.99                     |

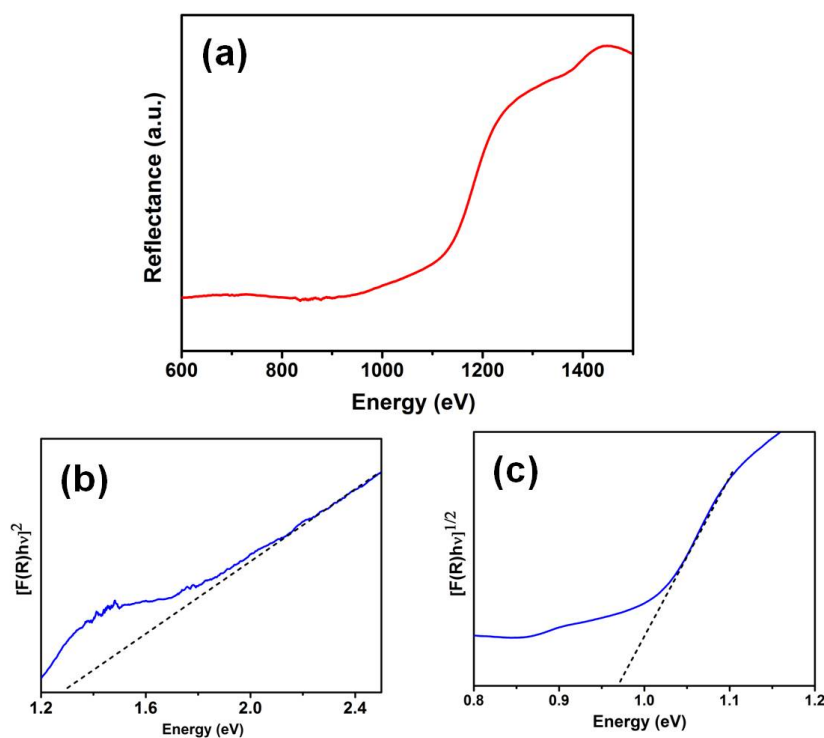

**Fig. S12** (a) Diffuse reflectance spectrum for SnSe-SnSe<sub>2</sub> composite HNs. Direct and indirect bandgaps were calculated from plots of  $[F(R)hv]^2$  and  $[F(R)hv]^{1/2}$  vs energy, shown in panels b and c, respectively.

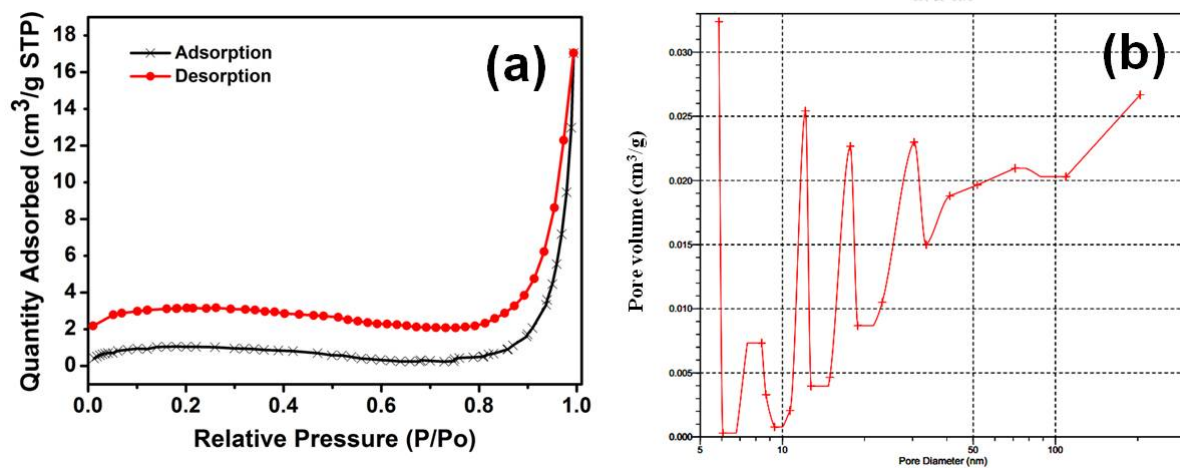

Fig. S13 N<sub>2</sub> adsorption-desorption isotherm and pore size distribution plots of SnSe HNs.

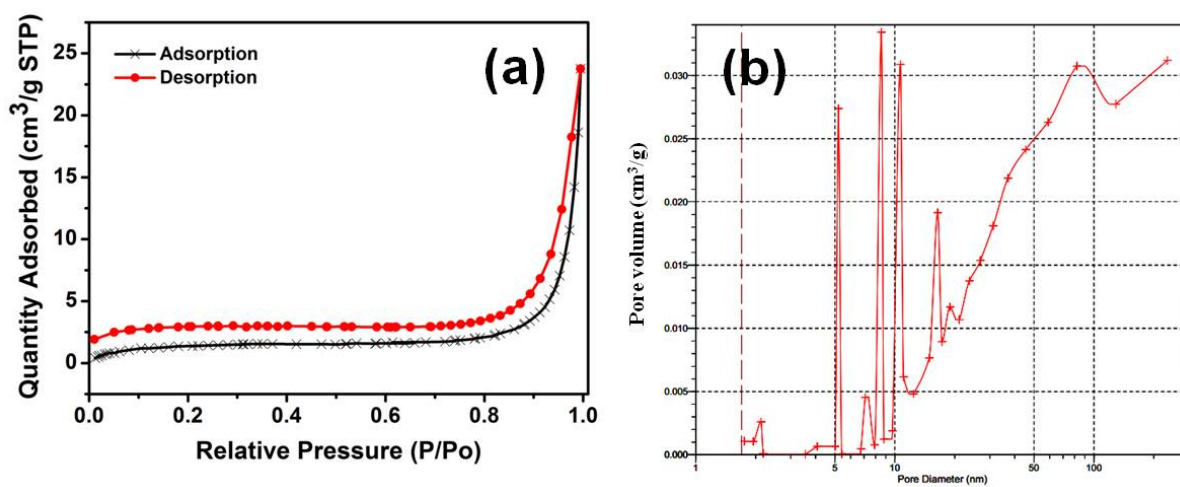

Fig. S14 N<sub>2</sub> adsorption-desorption isotherm and pore size distribution plots of SnSe<sub>2</sub> HNs.



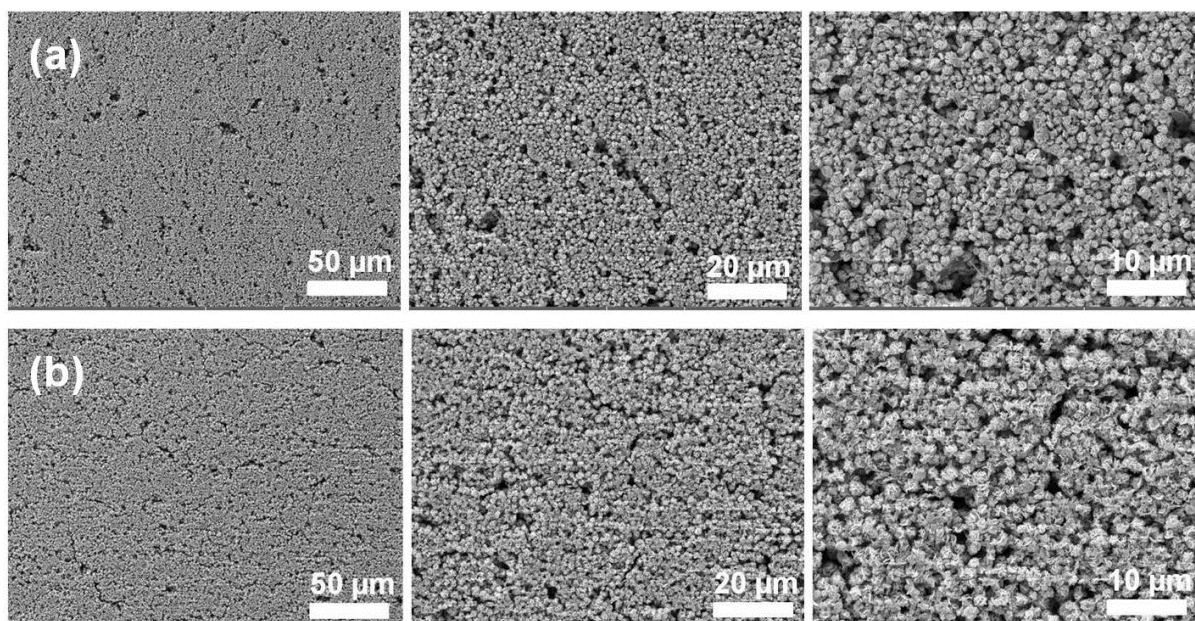

**Fig. S15** SEM images of (a) SnSe, and (b) SnSe<sub>2</sub> HN counter electrodes annealed at 500 °C in N<sub>2</sub> atmosphere.

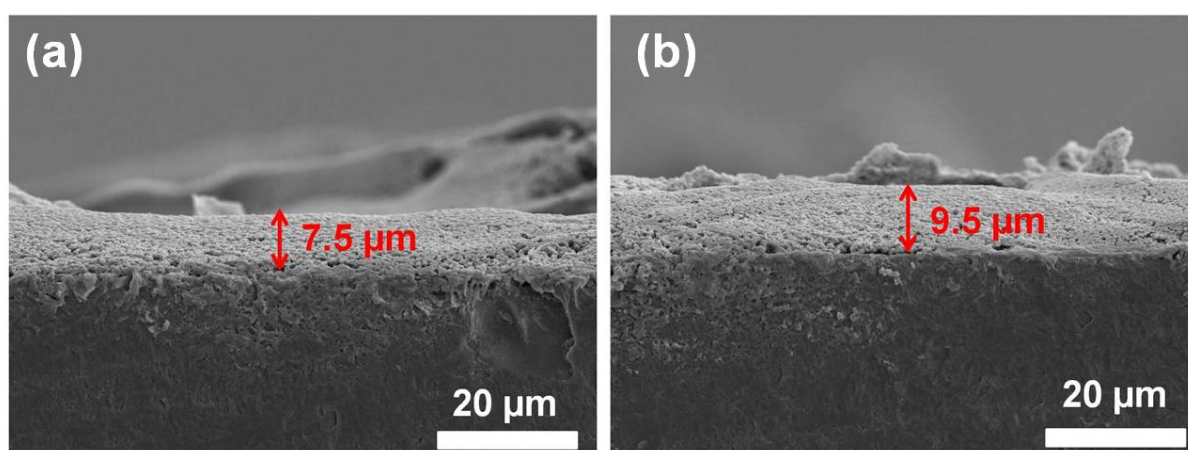

**Fig. S16** Cross-sectional SEM images of (a) SnSe, and (b) SnSe<sub>2</sub> HN counter electrodes annealed at 500 °C in N<sub>2</sub> atmosphere.



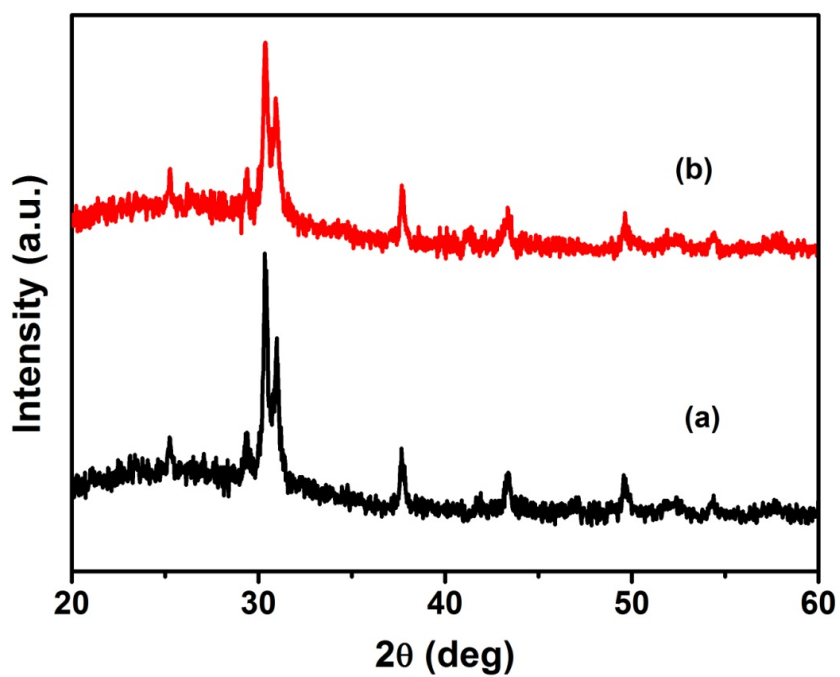

**Fig. S17** XRD patterns of SnSe HNs counter electrodes (a) before, and (b) after annealed at 500 °C in N<sub>2</sub> atmosphere.

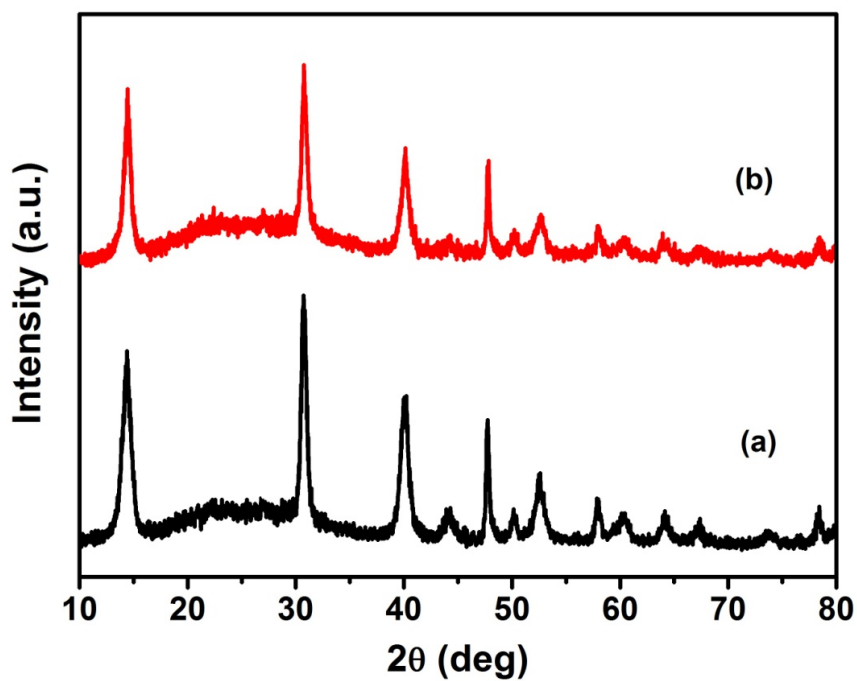

**Fig. S18** XRD patterns of SnSe<sub>2</sub> HNs counter electrodes (a) before, and (b) after annealed at 500 °C in N<sub>2</sub> atmosphere.

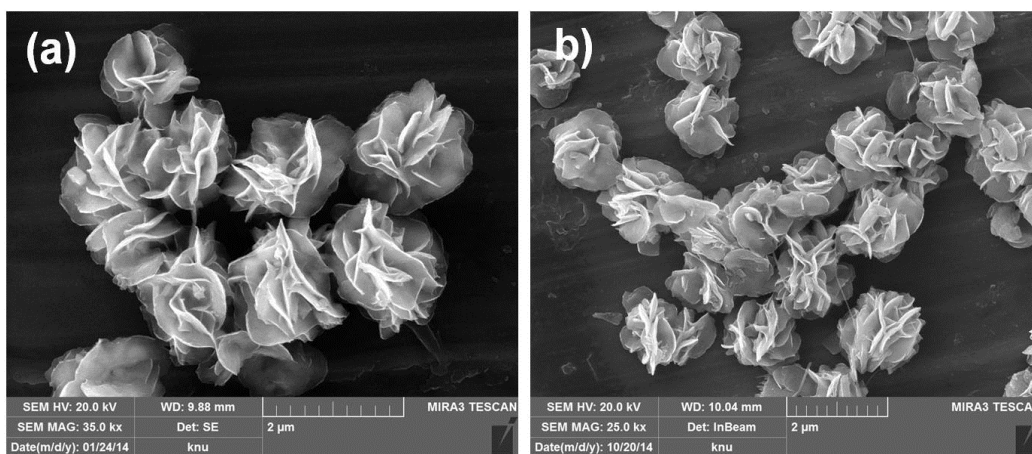

**Fig. S19** SEM images of SnSe HNs (a) as synthesized (b) stored at ambient conditions for 9 months.
